# Supplementary material
Source: PubMed Central journal article supplement (PMC3993227)
Supplement: AAC.01274-13_zac005142824so1.pdf [file AAC.01274-13_zac005142824so1.pdf]

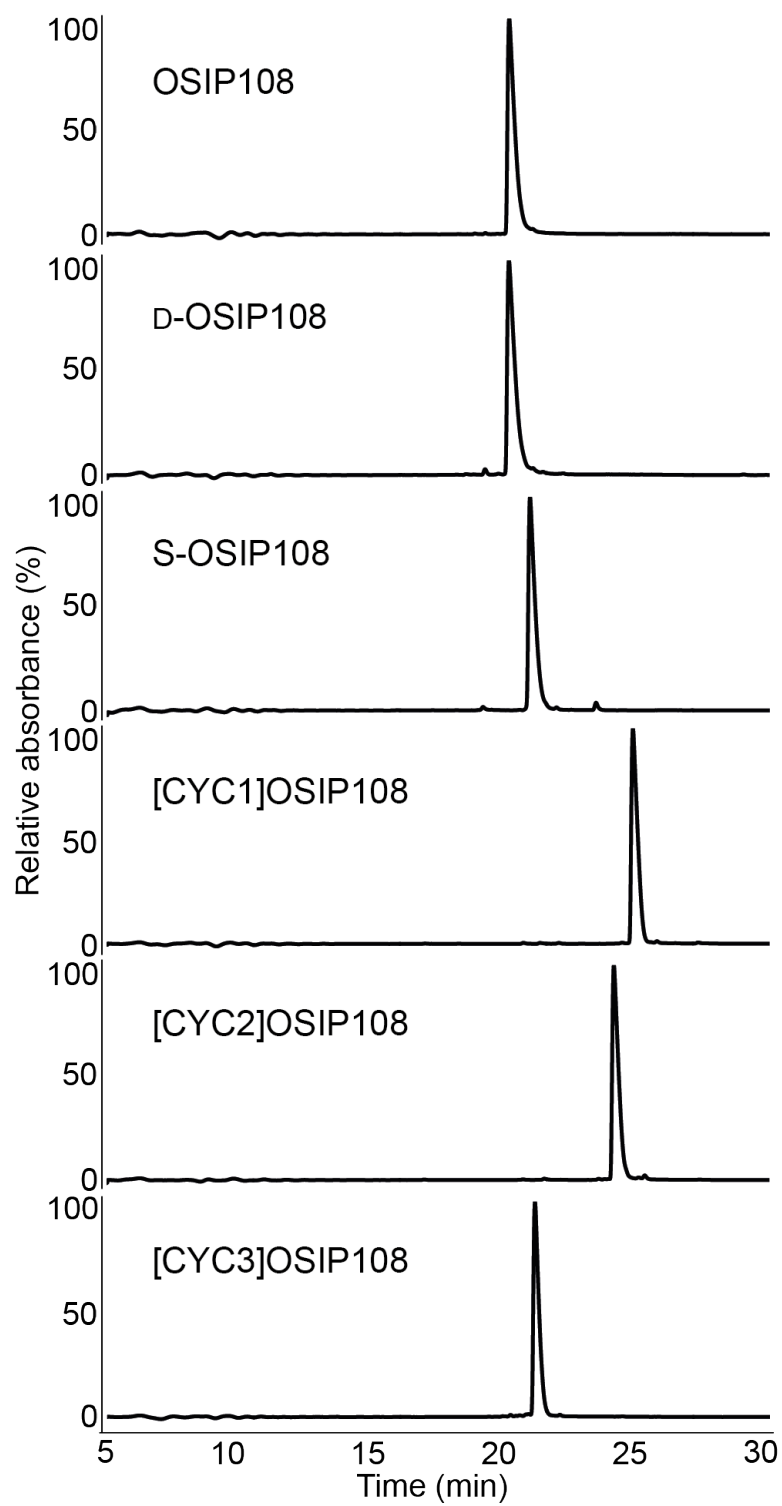

**FIGURE S1.** Analytical HPLC chromatograms of synthetic OSIP108 and analogues

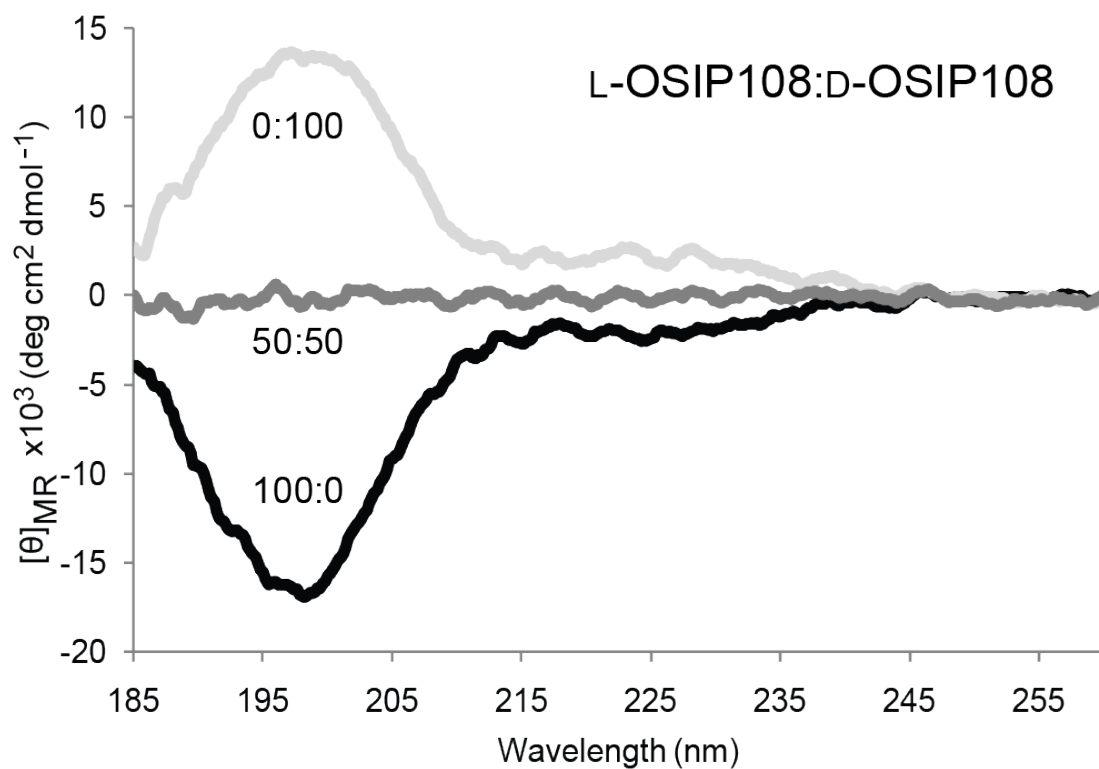

**FIGURE S2.** CD spectra of OSIP108, <sub>D</sub>-OSIP108 and 50:50 mixture of the two enantiomers in solution (50 μM in H<sub>2</sub>O) confirming the mirror image nature of the D-peptide.

**TABLE S1.** Purity, retention time and masses for OSIP108 peptides.

| peptide       | sequence                          | purity (%) <sup>a</sup> | RT (min) | calc. mass (Da) <sup>b</sup> | obs. mass (Da) <sup>c</sup> |
|---------------|-----------------------------------|-------------------------|----------|------------------------------|-----------------------------|
| OSIP108:      | MLCVLQGLRE                        | 99.4                    | 20.2     | 1161.43                      | 1161.41                     |
| D-OSIP108: D- | MLCVLQGLRE<br>(all D-amino acids) | 98.3                    | 20.2     | 1161.43                      | 1161.41                     |
| S-OSIP108     | ELRLVCMGQL                        | 97.0                    | 21.0     | 1161.43                      | 1161.41                     |
| [CYC1]OSIP108 | cyclo-<br>MLCVLQGLRE              | 98.5                    | 24.9     | 1143.42                      | 1143.38                     |
| [CYC2]OSIP108 | cyclo-<br>MLCVLQGLREGG            | 97.9                    | 24.1     | 1257.52                      | 1257.42                     |
| [CYC3]OSIP108 | cyclo-<br>MLCVLQGLREC             | 97.4                    | 21.1     | 1262.58                      | 1262.35                     |

<sup>a</sup> as determined by HPLC based on area of the 214 nm recorded peak

<sup>b</sup> average theoretical mass

<sup>c</sup> as determined by ESI-MS
